# Supplementary material
Source: PubMed Central journal article supplement (PMC3496200)
Supplement: supp_1200999_12-00999_S1.pdf [file supp_1200999_12-00999_S1.pdf]

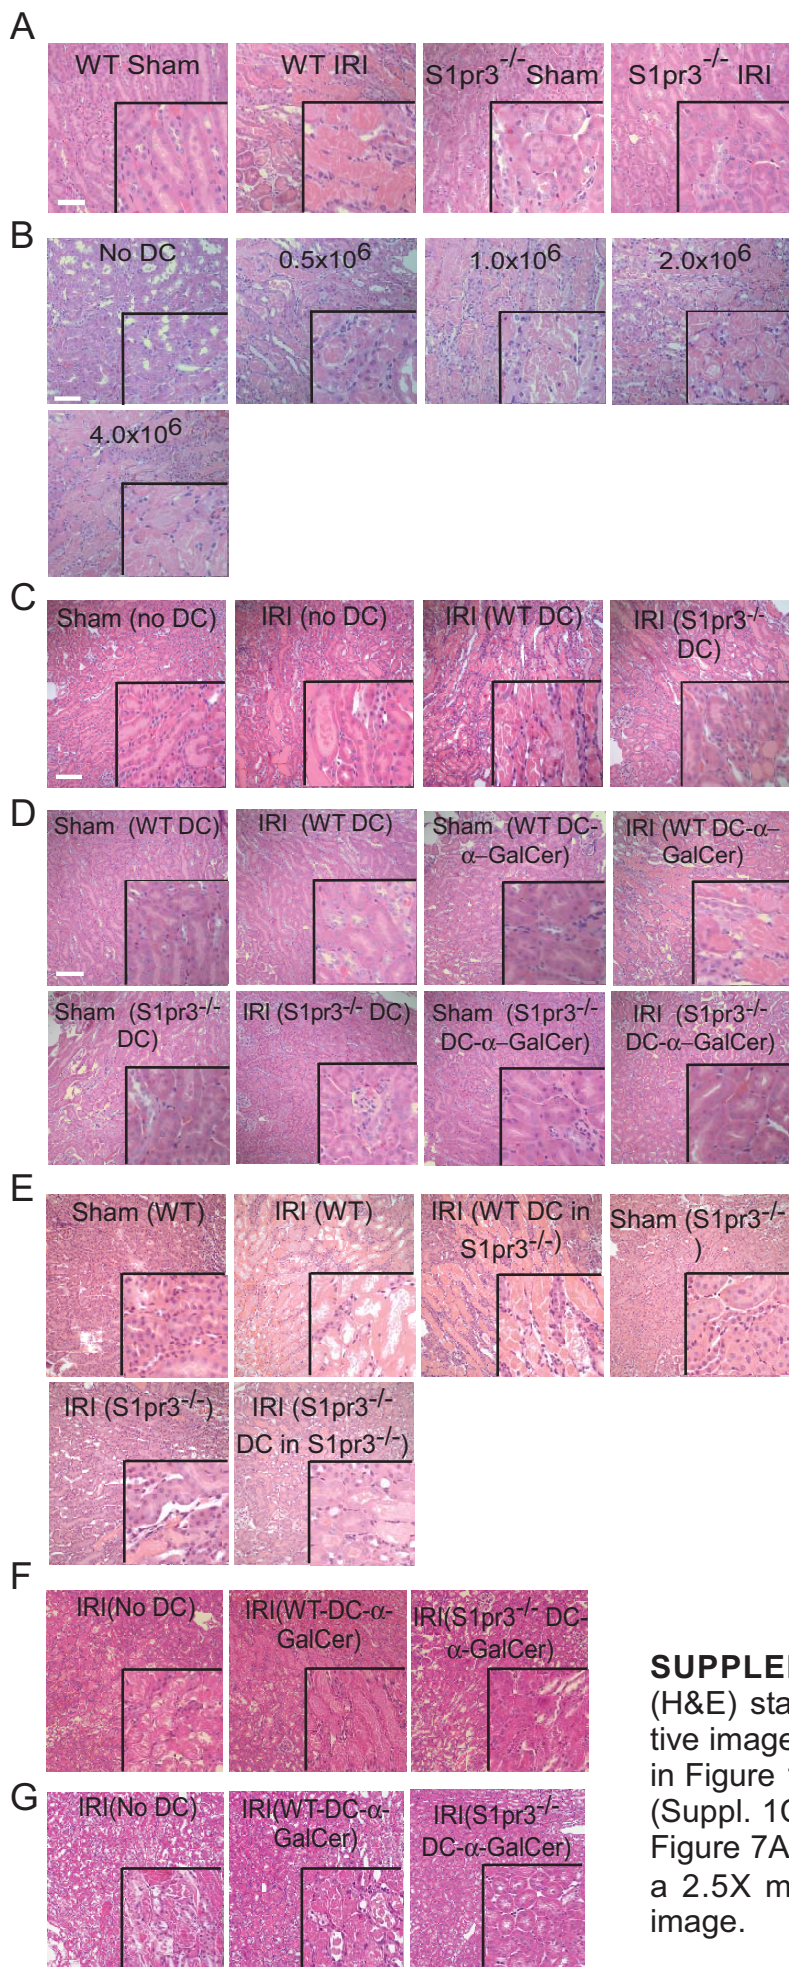

**SUPPLEMENTAL FIGURE 1.** Hematoxylin and eosin (H&E) staining of kidney sections after IRI. Representative images shown here correspond to experiments shown in Figure 1A (Suppl. 1A), Figure 3A (Suppl. 1B), Figure 3C (Suppl. 1C), Figure 4A (Suppl. 1D), Figure 6A (Suppl. 1E), Figure 7A (Suppl. 1F), Figure 7C (Suppl. 1G). Insets show a 2.5X magnified image. Bar = 100 $\mu$ m in unmagnified image.
